# Supplementary material
Source: publisher figshare collection journal article supplement (https://diabetesjournals.figshare.com/articles/dataset/_/15036348)
Supplement: Supplementary file 1 [file 1]

## Sheet: Sheet1
Table S2. Conserved predicted mRNA targets (according to TargetScan) of differentially expressed miRNAs with differiental expression in adipose tissue from T2D discordant monozygotic twins (p<0.05). * Among top 20 most differentially expressed genes in the discordant twins.
miR-518b	miR-374b	miR-455	miR-26-3p	miR-342	miR-2355	miR-411	miR-154-family	miR-504	miR-29c-3p	miR181a-2-3p	miR331-3p	miR338-5p	miR26b-5p	miR-151-5p	miR-151-3p	miR-29b-2-5p	miR181-5p	miR128-3p	miR-519-3p	miR-4421	let-7-family	miR-30-family
ABCF2	AFF4	ACACB	AASS	AP2M1	AASS	BNIP3	ATG7	ANKRD12	ADAMTS10	ABCA5	ARRB1	AASS	ACADSB	CASZ1	CASD1	ABCB7	ABI3BP	ACOT11	ABCD2	A4GALT	AASS	ABCB7
ADCK3	AKAP6	ACTR10	ABCA5	APBB2	ABCB7	C16orf52	BMPR1A	BEST1	AFF4	ABCB7	B4GALT2	ABCA5	ACVR1C	FBXO28	DECR1	ABCC1	ACVR1C	ACVR1C	ABHD12	ABCB7	ABCC5	ABCC9
ALDH1A3	ANAPC16	APH1A	ABCC1	BMP2K	ABCC9	C21orf91	CADM2	BNIP2	AP3M1	ABCC5	C1RL	ABCB7	ADAM9	KIAA1429	FRK	ABCD2	AFTPH	ADAMTS10	ACADSB	ABCF1	ACAP3	ABCD2
ARIH1	ANKRD12	ARIH1	ABCC9	BMPR2	ACACA	CALML4	CAPN7	DENND4B	ARF5	ABCC9	CSNK2A1	ABCC5	AKAP7	RALGAPA1	FXR1	ABCD3	ANAPC16	ADCY3	ACADVL	ABCF2	ACVR1C	ABI3BP
ATP6V1E1	ANLN	AZIN1	ABCF1	CA12	ACADL	CCNT1	CDH20	FAM63B	ARPP19	ABCD2	DLST	ABCC9	ALDH5A1		MAF	ABCF1	ANP32A	ADCY6	ACP2	ABHD11	ADIPOR2	ADAM9
ATP9B	APOPT1	BMPR1A	ACADSB	CAPN7	ACADSB	CLCN5	COPS2	FBXO28	ARRB1	ABHD12	F10	ABCD2	APOOL		MFAP5	ABI3BP	ANXA11	AFF4	ACSS2	ACACA	ADRB3	AFAP1L2
BACE2	ARHGAP5	BMPR2	ACOX1	CCNT2	ACAT1	ERBB4	COX20	FIZ1	ARRDC4	ACACB	FNDC4	ABI3BP	ARFGEF1		NAPEPLD	ACAD11	APOO	AK2	ACVR1C	ACACB	ADRBK2	AFF4
BRI3BP	ARID2	BRWD1	ACP2	CFL2	ACSS3	FAM204A	CREB3L2	FLT1	ASIC1	ACAD11	FSTL1	ACADL	ARID2		NPL	ACADL	ARF3	APPBP2	ADAMTSL3	ACAD11	AGPAT9*	AIDA
C15orf40	ATAD1	C1RL	ACP5	CSF1	ADAMTSL4	FZD4	CTDSPL2	FZD7	ATAD2B	ACADL	FZD4	ACADM	ARPP19		NRAS	ACADSB	ARID2	ARF3	ADCY6	ACOX1	AHCTF1	ALPK3
C5orf51	ATMIN	C6orf132	ACTG1	CTBP2	ADCY3	GTF2I	CUL2	GABRB2	ATG14	ACADSB	GBA	ACAT1	ATAD2B		PDE3A	ACOX1	ARIH1	ARFGEF1	ADIPOR2	ACP2	AKAP6	ANKRA2
CACNB1	ATP1A1	CAD	ACVR1C	DNM1	ADD3	HNRNPH3	DCLK1	GPC4	ATP1B1	ADAM33	GJC1	ACP6	ATP5A1		PDHA1	ACP6	ASAH2	ARID2	ADRBK2	ACTR5	ALDH6A1	ANO4
CLCN5	ATP8B2	CALR	ADCY7	DNM3	ADHFE1	KDM6A	FOXP2	GRAMD1B	B3GALT1	ADAMTSL3	HEXA	ACSS3	ATPAF1		RANBP17	ACSL1	ASIC1	ARRDC4	AFF4	ADAM33	ALPK3	AP1B1
CLN8	BACE1	CCNH	ADIPOR2	EPM2AIP1	AFF4	MIB1	FXR1	HTT	BACE1	ADCY7	KDELR1	ACVR1C	AZI2		RYBP	ACSS2	ATG7	ATP11B	AHCTF1	ADCK3	ANGPTL2	AP3M1
CPEB1	BCAT1	CDK17	ADRBK2	FAM126B	AGGF1	MMP19	FZD8	IPO11	BBS1	ADD3	LSP1	ADAM9	BAZ2B		SETBP1	ACSS3	ATMIN	ATXN10	AIDA	ADCY3	ANKRD46	ARIH1
CUL3	BHLHE40	CDON	AGK	FBXL20	AK2	PDS5A	GPRIN3	KIAA0930	BDKRB2	ADHFE1	MRS2	ADAMTSL3	BCAT1		SPATS2	ACVR1C	ATP1B1	BACE1	AKAP6	ADCY6	APPBP2	ATAD2B
DAP	BICC1	CERS4	AHCTF1	FLNC	AKIRIN2	PLA2G15	HNRNPR	KPNA5	BMF	ADIPOR2	NLN	ADRBK2	BCR		STRN3	ADAMTSL3	ATP8B2	BAZ2B	AKAP9	ADHFE1	ARHGEF7	ATL2
DAPK2	C11orf58	CNBP	AK2	GLG1	ALDH7A1	PREX2	LRRC40	LOXL2	BRWD1	ADORA3	RAP1A	AFF4	BFAR		TMEM98	ADIPOR2	B3GALT1	BCL3	ALCAM	ADIPOR2	ARPP19	ATP8B2
DHFR	CA12	COLEC12	AKAP6	GOLM1	ALPK3	RANBP2	LY9	LRRFIP1	C17orf103	ADRB3	RAPGEF2	AFTPH	BHLHE40		TRA2B	ADORA3	BAG4	BEND3	ALPK3	AIF1L	ARRDC4	AZIN1
DNAJA4	CADM2	CPNE4	ALCAM	GPC4	AMIGO2	RAPGEF2	LYVE1	NOL6	C21orf91	ADRBK2	RHOG	AGGF1	BMP2K		TWIST1	ADPRH	BAZ2B	BICC1	AMIGO2	ALDH6A1	ATAD2B	B4GALT6*
ELOVL6*	CAPZA2	CSNK1A1	ALDH5A1	IPO5	ANPEP	RORB	MAF	NRAS	CALM3	AGK	RPP14	AGL	BRWD1		UBE2N	AFF4	BCR	BMP2K	ANKRD12	ALPK3	ATPAF1	BAZ2B
FAM129B	CCL2	CTDSPL2	ALPK3	KIAA1462	ANXA11	RYBP	MARCH7	NSD1	CAPN7	AGL	SEC61A1	AGPAT9*	C14orf37		USP6NL	AHCTF1	BEND3	BMPR2	ANKRD29	ANGPTL2	B3GALT1	BDP1
FAM204A	CCL22	CUL3	AMIGO2	KLHL24	APOBEC3F	SLC30A6	MTUS1	PTPN4	CCDC50	AGPAT1	SLC25A1	AHCTF1	C17orf103		YTHDF3	AIDA	BHLHE40	C16orf52	ANKRD54	ANKRD1	B3GAT3	BEND3
FAM84A	CEP350	DLD	ANAPC16	MTDH	APOL2	SP1	NFYB	RAB35	CCDC88A	AGTRAP	SRGAP3	AIDA	CASZ1		ZNF292	AIF1L	BMF	CA12	ANXA11	ANKRD12	B3GNT1	BMPR2
FAM86B1	COPS2	DLG4	ANKRD46	NBEA	AQPEP	SSR3	PAPPA	RNF180	CCNT2	AIDA	SYNGAP1	AIMP1	CCBL2			AK2	BMPR2	CAPN7	APBB2	ANO6	BACE2	BNIP3L
FBXL20	CORO1C	EPM2AIP1	ANP32A	NCKAP1	ARFGEF1	UBE2W	PAWR	RORB	CD276	AKAP6	THBS1	AK2	CCDC28A			AKAP6	BRWD1	CCDC149	APH1A	ANTXR1	BCAP29	BRWD1
FBXO28	CREB3L2	ESCO1	ANXA11	NKAP	ARGLU1		PKNOX2	RPS9	CFL2	AKIRIN2	TNF	AKAP6	CCDC50			AKAP7	C1orf50	CCDC50	API5	ANXA4	BCAT1	C16orf52
FOXRED2	CTAGE5	FABP4	AP4S1	NSD1	ARHGAP5		PRKD3	RRAGC	CHIC2	ALDH3B1	TXLNA	AKAP7	CD38			ALCAM	CALM1	CCDC71	APOOL	AP4S1	BDP1	C21orf91
FRK	CTDNEP1	FBXL20	APBB2	P2RX6	ARIH1		RBM7	RYBP	CLCN5	ALDH5A1		ALCAM	CDH11			ALDH1A3	CALR	CCDC88A	AQP1	APBB2	BMPR1A	CADM2
GDAP2	CTDSPL2	FRYL	APOBEC3B	P4HA2	ARL6IP5		RYBP	SAMD4B	CLMN	ALG12		ALDH1A3	CDH20			ALDH2	CD163	CCNT2	AQP7	APH1B	BTF3L4	CAPN5
GIN1	DCLK1	GAL3ST4	APOL2	PCDH17	ARPP19		S100PBP	SETD9	COL16A1	ANKRD1		ALDH6A1	CDK8			ALDH6A1	CDC27	CDH11	AQPEP	APLN	C16orf52	CCNT2
GM2A	DMD	GRSF1	APOOL	PDE3B	ARRB1		SEMA4F	SLC9A7	COL1A2	ANO6		ANGPTL5	CEP350			ALDH7A1	CDK17	CDH24	ARHGAP1	AQP1	C5orf51	CDH20
H1F0	DSG3	HDAC2	APOPT1	PDGFRA	ART4		SMEK1	SMG1	COL25A1	ANP32A		ANKRD1	CHD1			ALOX5AP	CDK8	CDON	ARHGAP5	AQP3	CADM2	CEP350
HADH	EFNB2	HDX	ARHGAP22	PDLIM2	ASB1		STYX	SMNDC1	COL6A2	ANXA11		ANKRD12	CILP			ALPK3	CDON	CDS2	ARIH1	ARHGEF7	CALM1	CFL2
HELZ	EGR2	HM13	ARHGAP5	PIK3IP1	ATE1		TBC1D15	ST8SIA1	COL6A3	AP1B1		ANKRD26	COL1A2			ANKRD12	CDS2	CKAP4	ATF6B	ARMC10	CCL3L1	CHD1
IDS	ETV5	HSF1	ARID2	PTRF	ATL2		TMEM108	STARD3	COL6A6	AP2A2		ANKRD46	COPS2			ANKRD46	CEP350	CLCN5	ATG7	ARRB1	CCNT2	CHKA
IL12RB2	FAF2	HSPBAP1	ARRDC4	RAP2B	ATP11B		TMEM133	SYNGAP1	CTDSPL2	APBB2		ANLN	CORO1C			ANXA11	CHD1	CNOT7	ATMIN	ARRDC4	CD86	CHMP2B
IPO11	FAM63B	IQGAP1	ART4	RASSF1	AVPI1		TSHZ2	TAX1BP3	CTSF	APH1B		ANO6	CPEB2			ANXA4	CHURC1	CORO1C	ATP11B	ASB1	CDK8	CLEC14A
JDP2	FZD8	KLHL24	ASB1	RMND5A	AZGP1		UST	THUMPD1	CUEDC1	AQP1		ANP32A	CTH			AP4S1	CKAP4	CSE1L	ATP6V0B	ASH1L	CDV3	CLN8
JMY	GAS7	KLK12	ATE1	RSBN1	B3GALT1		VPS4B	TRA2B	CYCS	AQP7		AP1B1	DAB2			APBB2	CLMN	CSF1	ATP7B	ASPA	CERCAM	COL25A1
KCNJ5	GLG1	LPAR2	ATG14	SERPINE1	BAZ2B		ZNF451	TULP4	DCUN1D4	AQPEP		AP3M1	DCLK1			APOBEC3C	CLVS1	CTDSPL2	ATXN10	ATF5	CFL2	COL4A3BP
KCNQ5	GLIS3	LPHN2	ATMIN	SGMS2	BBS1			WAPAL	DCUN1D5	ARFGEF1		APBB2	DLG4			APOBEC3F	CNOT6L	CTH	AVPI1	ATG7	CHUK	COTL1
KIN	GNPTG	LTBP4	ATP11B	SLC5A3	BDKRB2			WHSC1L1	DDX46	ARHGEF7		APH1B	DMD			APOOL	COL16A1	DAZAP2	AZGP1	ATP11B	CLCN5	CPEB2
KLHL15	GPT2	MAF	ATP7B	SOX6	BEND3			XYLT1	DHTKD1	ARID2		APOOL	DNAJA2			AQP1	COPS2	DCUN1D4	AZIN1	ATP6V0D2	CNOT6L	CPSF6
LAPTM5	GRAMD1B	METTL15	AZIN1	TFDP2	BET1			ZBTB7A	DIAPH2	ARIH1		AQPEP	ENPEP			ARHGAP5	CORO1C	DGKE	B3GALT1	ATPAF1	COIL	CSNK1A1
LPIN1	GTF2A2	MFAP2	B3GALT1	TIA1	BMF			ZNF24	DIO2	ARL6IP5		ARFGEF1	ERBB4			ARHGEF7	CPSF6	DUSP18	BACE1	AVPR1A	COL1A2	CSNK2A1
LRP11	HCFC1	MOSPD1	BACE2	TMEM98	BMP2K				DNM3	ARPC4		ARGLU1	ESCO1			ARMC10	CSNK1A1	EEPD1	BANK1	AXL	COL4A3BP	CTDSPL2
LRRN4CL	HECTD1	NECAB3	BANK1	TTBK2	BMPR2				DPYSL2	ARPP19		ARHGAP22	EVX2			ARRB1	CUL3	EFNB2	BCAP29	AZGP1	CPA4	CTH
LTBP2	HIAT1	NLN	BAZ2B	WDR5B	BNIP3L				DPYSL3	ARRB1		ARHGAP5	FAM118A			ARRDC4	CUL5	ELOVL6*	BCAT1	BACE1	CPEB1	CTHRC1
MAFB	HSD11B1	PDE3B	BDP1	YIPF2	BTBD1				DSG3	ARRDC4		ARHGAP6	FAM172A			ART4	DAZAP2	FADS1*	BDH1	BAZ2B	CPEB2	CUL2
MILR1	HSDL2	PGAP3	BEND3	ZFR	BTF3L4				ENPP2	ASAH2		ARID2	FAM63B			ARV1	DCLK1	FAM102A	BEST1	BCAT1	CRBN	DCTN4
MR1	IQSEC2	PPP2R2A	BEST1		C12orf43				FAM109B	ASB1		ARIH1	FBXL20			ASAH2	DDIT4	FAM126B	BFAR	BCR	CSNK2A1	DDIT4
MSC	JAM2	PRR19	BFAR		C12orf49				FAM126B	ASH1L		ARPP19	FBXO11			ASH2L	DMXL2	FAM133B	BMF	BEND3	CTDSPL2	DDX46
MSH3	JMY	PUM2	BHLHE40		C14orf37				FASTK	ASIC1		ARRB1	FBXO28			ATAD2B	DNAJA4	FAM134C	BMP2K	BEST1	DCUN1D2	DEXI
MSI2	KANSL1L	RAB35	BMP2K		C16orf52				FBXL18	ASPA		ASAH2	FOXJ3			ATG14	DPP6	FAM13A	BMPR1A	BFAR	DIAPH2	DGKE
MTERFD1	KIAA1432	RARB	BMPR2		C16orf59				FBXL20	ATAD2B		ASB1	FOXP2			ATG3	DPYSL2	FAM172A	BMPR2	BMPR1A	DLST	DHX36
MYO10	LARP4	RICTOR	BNIP3		C17orf103				FBXO28	ATF6B		ASH2L	FUBP1			ATL2	ELP4	FBXL20	BNIP2	BMPR2	DMD	DIO2
MYO5A	LHFPL2	RNF24	BTF3		C17orf53				FBXW7	ATG14		ATAD1	GPC4			ATP1B1	ETS1	FBXW7	BRI3BP	BNIP3L	DNA2	DLD
NCAPH	LPAR1	RSPH3	BTNL3		C18orf21				FERMT2	ATP11B		ATG14	GREB1L			ATP5A1	EVX2	FGF14	BRWD1	BOC	DNAJA2	DMD
NSD1	LPHN2	RUNX1	C14orf37		C1QTNF1				FSTL1	ATP5A1		ATG3	GRSF1			ATP5G1	EXOSC3	FNDC4	BTF3L4	BOK	DPYSL3	DNAJC15
OPA1	MAP2K4	RUSC1	C15orf38		C5AR1				FZD4	ATP6V0D1		ATMIN	GSK3B			ATP6AP1L	FAM102A	FOXP2	BTG3	BRMS1	DSG3	DPYSL2
ORC5	MAPK6	S100PBP	C18orf21		C5orf22				GAS2L3	ATP6V0D2		ATP11B	GSR			ATP6V1E1	FAM126B	FRYL	C11orf58	BTRC	ELF4	ELOVL5
P2RX7	MED12L	SEC62	C21orf91		C8orf46				GAS7	ATP7B		ATP1B1	GTF2A1			AZI2	FBXO11	FUBP1	C14orf37	C10orf2	ELK4	ELOVL6*
PAN3	MKX	SLC35F1	C5orf22		C9orf114				GEMIN2	ATP8B2		ATP5G1	HELZ			B3GALT1	FBXO34	GGA2	C15orf37	C11orf54	EXOC5	EPDR1
PAWR	MMP14	SMAD2	C7		CA12				GLIS2	ATXN10		ATP6V1E1	HIAT1			B4GALT6*	FLT1	GOLM1	C16orf52	C12orf49	FADS3	ESCO1
PCMTD1	MOB4	SMG1	CA5B		CA5B				GLIS3	AZI2		ATRX	HMGA1			BACE1	FOXP2	GPAM	C1orf50	C15orf38	FAM118A	EVX2
PDE11A	MSH3	SMTN	CADM2		CA8				GOLGA7	B4GALT2		ATXN10	HSDL2			BACE2	FRYL	GPRIN3	C21orf91	C1orf220	FARP1	EYA2
PDGFRB	MSI2	SNX30	CALCRL		CADM2				GPAM	B4GALT6*		AVPR1A	IGF1			BAG4	FSTL1	GREB1L	C3AR1	C1orf50	FASTK	FAF2
PDK1	MSX1	SORBS3	CAPZA2		CAP1				GRAMD1B	BACE1		AZI2	ITGA5			BBS1	GAPVD1	GSK3B	CA8	C1RL	FOXP2	FAM109B
PEX10	MYO10	SORD	CASD1		CAPN7				GSK3B	BACE2		AZIN1	ITGA6			BCAP29	GAS7	GTF2A2	CACNB1	C2orf15	FZD4	FAM110B
PLBD2	N4BP2	SOX6	CBR4		CCDC3				HBP1	BBS1		B3GALT1	JAKMIP2			BCAT1	GHITM	HDAC4	CADM2	C3	GALC	FAM126B
PPP2R1A	NCKAP1	STOX2	CCDC149		CCDC80				HDAC4	BCAT1		B4GALT6*	KDM6A			BCR	GLIS3	HECTD1	CALCRL	C8orf46	GAS7	FAM13A
PRDX6	NCOA2	TARDBP	CCDC50		CCNT2				HELZ	BCKDHB		BACE1	KIAA1598			BET1	GNAQ	HSPD1	CAPN7	CA12	GATM	FAM46A
PREX2	NEDD4L	TAZ	CCDC88A		CD109				HEY2	BCR		BAG4	KIAA1737			BHLHE40	GOT2	HTT	CASD1	CA5B	GDAP2	FBXL20
PTPRU	NFYB	TCF25	CCNH		CD151				HMGCS1	BDH1		BAZ2B	KIAA2018			BMP2K	GPBP1	IGF1	CCBL2	CA8	GJC1	FBXO28
PXDNL	NLN	TMEM64	CD109		CD300A				IFI30	BDKRB2		BCAP29	KLHL15			BMPR1A	GPD1L	IRS1	CCDC3	CAPN5	GK5	FBXO34
QKI	NR3C1	TOR1B	CD28		CD36				IGF1	BDP1		BCAT1	KLHL24			BNIP3	GPR180	ITGA5	CCDC50	CAPN7	GNG5	FRK
RANBP9	NRK	TRAPPC8	CD44		CD44				IREB2	BEST1		BCKDHB	KPNA5			BOC	GREB1L	KCND3	CCDC80	CAPZA2	GOLGA4	FRZB
RAP1B	NRN1	TRIM3	CD84		CD84				IRS1	BFAR		BET1	LARP4			BRIX1	HECW2	KIAA0232	CCDC88A	CASQ2*	GOLGA7	FUBP1
RCL1	NUMBL	TXLNG	CDC27		CDC27				ITGA6	BMF		BMP2K	LOXL2			BRWD1	HEY2	KIAA1109	CCNI	CBR1	GPC4	FUCA1
RICTOR	PAPLN	TYRO3	CDK15		CDCP1				JMY	BMP2K		BMPR1A	LRRC16A			C10orf90	HNRNPH1	KIF3A	CD44	CCDC59	GPR137	FXR1
RPS9	PAPPA	USP47	CDKN1B		CDH11				KCNIP2	BMPR1A		BMPR2	LSM12			C11orf54	HNRNPR	KPNA5	CD83	CCDC71	GRAMD1B	FYN
RRN3	PCF11	XPO1	CDKN2AIP		CDKN1B				KIAA1432	BMPR2		BNIP2	MAP1A			C12orf49	HOXD1	LARP4	CD84	CCL22	GREB1L	GATM
SCRN1	PCNX	ZFP36L1	CDON		CDON				KIAA2018	BNIP3		BNIP3	MAP1B			C14orf37	HSPA5	LASP1	CDADC1	CCL4L1	GTF2I	GCLC
SERTAD2	PDE3A	ZNF24	CDS2		CDS2				KLHL8	BNIP3L		BRI3BP	MAPK6			C15orf38	HTT	LIMK1	CDS2	CCNT1	GYG2	GNAQ
SH3KBP1	PDZD2		CENPI		CENPI				LARP4	BOK		BRWD1	MARC1			C16orf45	HYOU1	LIN7C	CECR1	CCNT2	HCFC2	GNG10
SH3PXD2B	PIK3CA		CEP350		CEP350				LASP1	BRI3BP		BTBD1	MATR3			C17orf103	IGF2BP3	LMTK2	CEP350	CD109	HDX	GOLGA4
SIRPA	PIKFYVE		CERS4		CFD				LEPRE1	BRIX1		BTF3	MCC			C17orf75	IPO5	LRRFIP1	CEP70	CD163	HELZ	GOT2
SLC25A16	PLCE1		CFD		CHURC1				LIN7A	BRWD1		BTF3L4	MED12L			C1orf220	IQSEC2	LSM12	CERCAM	CD276	HMGA1	GPR180
SLCO4C1	PNPT1		CHIC2		CIR1				LOXL2	BTF3L4		BTG3	MEF2C			C21orf91	ITGA3	MAFG	CERS4	CD300A	HOXD1	GPRIN3
SNX13	PRPF40A		CHMP2B		CLASRP				LPL	BTRC		BTRC	METAP2			C2ORF15	ITGA6	MAPK6	CFD	CD36	IGDCC4	GPT2
SNX30	PTEN		CHST15		CLDN11				LTBR	C10orf68		C11orf74	MFHAS1			C5orf51	KANK1	MAPKAPK3	CFL2	CD44	IGF1	GREB1L
SRGAP1	PUM2		CLCN5		CLIC1				MAFB	C11orf49		C12orf49	MFSD6			C9orf114	KAT2B	MARCKS	CHD1	CD84	IGF2BP3	GTF2H1
SYT1	QKI		CLMN		CLIC4				MAFG	C11orf54		C16orf45	MIB1			CA11	KCNQ5	MED12L	CHD2	CDADC1	IKBKE	H6PD
TIA1	RANBP9		CLU		CLIC5				MAPK8	C11orf58		C16orf52	MITF			CA12	KIAA0226	MET	CHST14	CDCP1	IL6R	HCFC2
TTBK2	RMND5A		CNOT6L		CLMN				MARCH7	C12orf49		C17orf53	MLLT3			CA5B	KIAA1462	MFHAS1	CHURC1	CDV3	IPO11	HELZ
TULP4	RORB		CNOT7		CLVS1				MED12L	C14orf37		C18orf21	MMP14			CACNB1	KIAA2018	MLLT10	CIDEA	CECR1	ISLR	HHIPL1
TYRO3	RYBP		COBLL1		CNBP				MEGF6	C14orf39		C1QTNF5	MSMO1			CAD	KIF3A	MNT	CIT	CENPI	KIAA0930	HIAT1
UCHL1	SATB1		COL6A1		COBLL1				METAP2	C16orf45		C1S	MTDH			CADM2	KLF15	MSI2	CKS1B	CERS4	KIAA1958	HNRNPA2B1
USPL1	SCOC		COPS8		COG5				MFAP2	C16orf52		C21orf91	MTX2			CALCRL	KLHL15	MTA3	CLCN5	CFD	KLHL23	HNRNPA3
VAPB	SCRN3		COX11		COL25A1				MIB1	C17orf75		C5AR1	MYCBP			CALM3	KLHL5	MTDH	CLIC4	CFL2	KPNA5	HSPA5
WDR1	SERTAD2		CPNE3		COL4A3BP				MLXIP	C18orf21		C5orf51	NCAM2			CALML4	LARP4	MYH10	CLMN	CHD2	LGR4	IRF2BP2
WNK1	SETBP1		CPSF6		COPS8				MMP2	C1RL		C6orf123	NCEH1			CALR	LGI2*	NAPEPLD	CMTM3	CHIC2	LYVE1	IRS1
YIF1B	SETD2		CRB1		CP				N4BP2	C3		CA12	NEK6			CCBL2	LIN7C	NBEAL1	CNBP	CHMP2B	MAP3K13	ITGA6
YIPF4	SGIP1		CREB3L2		CPEB1				NANP	C5orf22		CA8	NETO1			CCDC50	LMTK2	NCS1	CNOT6L	CHUK	MAPK6	JAKMIP2
ZBTB7A	SHOC2		CRIPT		CPSF6				NCKAP5L	C6orf118		CADM2	NHSL1			CCDC71	LRRFIP1	NEDD4	CNOT7	CHURC1	MAPK8	JAM2
ZNF71	SLC25A16		CRLS1		CREB3L2				NDN	C8orf46		CALM1	NLGN1			CCDC80	LRRN1	NEK6	CNTN3	CKAP4	MED6	JDP2
	SLC25A33		CRTC3		CRYZ				NEGR1	C9orf114		CALM3	NRAS			CCDC88A	MAGOHB	NETO1	CNTROB	CLMN	MEF2C	KCTD7
	SLC35A3		CRYZ		CSNK1D				NFATC4	CA11		CAPN7	NRIP1			CCDC91	MAMDC2	NLN	COA5	CLN8	MIB1	KIAA1522
	SLIT3		CSN1S1		CSNK2A1				NIPSNAP3B	CA12		CAPZA2	OCLN			CCL4L1	MAP1A	NPTX1	COBLL1	CLU	MLLT10	KIF3A
	SP1		CTH		CST3				NRAS	CA5B		CASD1	PAIP2B			CCNT2	MAP1B	NRK	COG5	CNBP	MLXIP	KIF3C
	SPTLC1		CYCS		CTAGE5				NSD1	CACNB1		CBR4	PAN3			CCR1	MAP3K8	NSD1	COL4A3BP	CNNM4	MOB4	KLHL24
	SRGAP1		DAP		CTSD				PAIP2	CALM1		CCDC28A	PAWR			CD28	MAPK8	OPA1	COPS2	CNPY3	MRS2	LARP4
	ST8SIA4		DBT		CTTNBP2				PALM2-AKAP2	CALML4		CCDC50	PCNX			CD36	MARCKS	ORC5	COX10	COA5	MSI2	LHFPL2
	STMN2		DCTN4		CXCL16				PAN2	CAPN5		CCDC80	PDCD10			CD74	MCC	PAIP2	COX20	COL4A3BP	MTDH	LIN7C
	STXBP5		DCTPP1		CYB5B				PCDH17	CAPN7		CCDC82	PDE3B			CD84	MED12L	PAIP2B	CPEB1	COPS8	MTUS1	LRCH2
	STYX		DCUN1D5		DBT				PDE3A	CAPZA2		CCL18*	PDHX			CD99	METAP2	PAPPA	CPEB2	CORO1C	MYCBP	LRFN2
	SYDE2		DECR1		DCT				PDGFB	CBR4		CCL4L1	PEX13			CDADC1	MFSD6	PCM1	CPSF6	COX10	NAPEPLD	LRRC40
	SYNE1		DGKE		DCUN1D2				PDGFRB	CCDC134		CCNT2	PFKFB2			CDH20	MID2	PCNX	CRB1	CPA4	NAT8L	MAF
	TBX4		DIAPH2		DENND4B				PDHX	CCDC50		CCT8	PFKFB3			CDK15	MITF	PDE3A	CREB3L2	CRBN	NEDD4L	MAFG
	TMEM108		DIO2		DIO2				PEX5	CCDC80		CD109	PGRMC2			CDK17	MLXIP	PDE3B	CRHBP	CRIPT	NEFM	MAN1B1
	TNKS2		DLD		DLD				PGAP1	CCDC82		CD28	PHF20L1			CDKN1B	MMP14	PDGFRA	CRIPT	CRTC3	NKAP	MAP3K12
	TOP1		DLG1		DMRT2				PGM3	CCL3L1		CD36	PHF3			CDKN2AIP	MOSPD1	PDHX	CRLS1	CSE1L	NLN	MAPK8
	TRAPPC8		DMTF1		DNA2				PIK3CA	CCNC		CD38	PHLDB2			CDS2	MPP7	PDK1	CRTC3	CSF1	NRAS	MARCH3
	TTBK2		DNAJC19		DNAJA4				PIK3CB	CCR1		CD84	PIK3C2A			CDV3	MSI2	PDLIM2	CSF1	CSNK1A1	NRK	MARCKS
	TTC37		DPYSL2		DNAJB6				PIK3R3	CD209		CD9	PIK3CB			CEP350	MSL2	PDS5B	CSNK1A1	CSNK1D	NSD1	MATR3
	TTLL7		DPYSL3		DNAJC15				PLEKHF2	CD28		CDADC1	PIK3R3			CERCAM	MTMR10	PGAP1	CTDNEP1	CST3	NUMBL	ME1
	TXLNB		DRG1		DPCR1				PLXNA1	CD38		CDC27	PLBD2			CERS4	MYCBP	PHGDH	CTH	CTDNEP1	P4HA2	MED12L
	UBA6		DTWD1		DRG1				PMP22	CD44		CDCP1	PLCB1			CHD1	NBEA	PIK3C2A	CTSK	CTSB	PAPPA	METAP2
	USP30		DYRK3		ECHDC3				PPM1E	CD84		CDH11	PLCL1			CHD2	NCOA2	PIK3CA	CUL3	CYB5B	PAWR	MFHAS1
	USP47		DZIP3		EDARADD				PPP2CA	CDCP1		CDK17	PLOD2			CHMP2B	NEGR1	PKIB	CYB5B	CYCS	PCYOX1	MFSD6
	UST		EFNB2		EEPD1				PRPF40A	CDH11		CDON	PPP2R5A			CHMP5	NKAIN2	PLA2G15	CYB5R3	CYTH4	PDGFB	MIB1
	WRN		EIF1B		EFCAB2				PTEN	CDK15		CDS2	PPP3CB			CHST15	NKAP	PLCE1	CYCS	CYTL1	PI4K2B	MID2
	ZNF189		ELOVL6*		EFCAB6				PTPN4	CDK17		CDV3	PPP3R1			CHUK	NLN	PLCL2	CYP3A43	DAB2	PIK3CA	MIS18BP1
	ZNF207		ENPEP		ELOVL6*				PTRF	CDK4		CENPI	PPP6C			CHURC1	NR3C1	PLXND1	CYTH4	DAP	PIK3IP1	MLXIP
			ERI2		ENPEP				QKI	CDK8		CEP112	PTEN			CIT	NRAS	PNISR	DAB2	DBT	PKN2	MMP19
			ESCO1		EPM2AIP1				RAP1A	CDKN2AIP		CEP350	PTPN3			CKS1B	PAN3	POTEM	DAP	DCLK1	PLA2G15	MNT
			ETS1		EPRS				RARB	CDON		CFL2	PTPN4			CLCN5	PAWR	PPARG	DAPK2	DCLRE1B	PLD3	MSI2
			F10		ESCO1				RLF	CDS2		CHD1	RAB11A			CLIC5	PCSK1	PPM1E	DAZAP2	DCPS	PLXND1	MTDH
			FADS1*		ESR2				RLIM	CDV3		CHD2	RAB31			CLMN	PDCD4	PTGFRN	DBT	DCTN3	POTEM	MYO5A
			FAM102B		ETS1				RMND5A	CENPB		CHIC2	RANBP9			CLN8	PDE3A	PTPN4	DCAF4	DCUN1D2	PPP2R2A	N4BP2
			FAM120B		EVX2				RYBP	CEP112		CHURC1	RAP1A			CMTM3	PDGFRA	PTPRT	DCLK1	DCUN1D5	PRRX1	NCS1
			FAM126B		EXOC5				SCAI	CEP350		CIT	RAP1B			CNBP	PDHX	QKI	DCTPP1	DECR1	PTPRU	NECAB1
			FAM133B		F10				SCHIP1	CEPT1		CLCN5	RAP2C			CNOT6L	PGRMC2	RAB33B	DCUN1D4	DIO2	RAB3GAP2	NEDD4
			FAM162B		FADS1*				SCYL2	CERS4		CLEC14A	RB1			CNOT7	PHF3	RAB4A	DCUN1D5	DMD	RANBP2	NEDD4L
			FAM20A		FAM102A				SERBP1	CHD2		CLEC1A	RBM12B			CNTN3	PHIP	RAP1B	DDX46	DMRT2	RB1	NEFM
			FAM63B		FAM118A				SERINC5	CHURC1		CLIC4	RBM24			CNTNAP1	PHLDA1	RAPGEF2	DECR1	DNAJC15	RBMS1	NEGR1
			FAR1		FAM162B				SFXN3	CKAP4		CLMN	RBM47			CNTROB	PI4K2A	RGPD4	DEXI	DNAJC8	RICTOR	NFYB
			FASN		FAM168A				SGMS2	CLEC1A		CLVS1	RBMS1			COA5	PI4K2B	RGPD6	DGKE	DNM1	RNFT1	NKAIN2
			FASTKD2		FAM172A				SH3GLB1	CLU		CMTM3	RCN2			COBLL1	PIK3C2A	RLIM	DIAPH2	DNM3	RRM2	NLGN1
			FBXO28		FAM195B				SH3PXD2B	CLVS1		CNBP	REEP3			COL1A2	PIK3CB	RNF144A	DNAJB6	DPCR1	SAMD12	NR3C1
			FBXO34		FAM204A				SHROOM4	CNBP		CNNM4	REEP4			COL25A1	PIK3R3	RNF146	DNAJC28	DPYSL2	SCARA3	NRIP1
			FBXO9		FAM20A				SIDT2	CNNM4		CNOT6L	RLF			COL4A3BP	PKN2	RNGTT	DPYSL2	DPYSL3	SCD	NRK
			FICD		FAM3A				SIKE1	COA5		CNOT7	RNF213			COL6A1	PKNOX2	RORB	DRG1	DYRK3	SEC14L1	NSD1
			FIZ1		FAM47E				SIRT1	COG5		COBLL1	RSPRY1			COLEC12	PLCL2	RRAS	DSG3	EEPD1	SECISBP2L	OXR1
			FOXJ3		FAM63B				SLC16A10	COL25A1		COG5	RYK			COPS2	PLEK	RSBN1	EGR2	EFCAB2	SEMA4F	P4HA2
			FOXP2		FAM71F2				SLC16A14	COPS2		COIL	SAMD12			COPS8	PNISR	RSPO3	EIF3M	EIF2A	SLC12A9	PAQR5
			FRA10AC1		FAM84A				SLC16A7	COPS8		COL4A3BP	SAR1B			CORO1C	PODXL	RUNX1	ELK4	EIF3M	SLC16A10	PAWR
			FRK		FAR1				SLC36A1	CORO1C		COPS2	SERBP1			COTL1	POLQ	RYBP	ELOVL3	ELOVL6*	SLC16A14	PCDH17
			FRYL		FASTKD2				SLC39A13	CREB3L2		COX20	SLC12A2			COX11	PPARA	SAMD12	ERBB4	EMILIN2	SLC25A4	PDCD10
			FXR1		FBXL18				SMARCE1	CRELD2		CPEB2	SLC16A10			COX20	PPP3R1	SCAI	ERCC1	ENG	SLC30A6	PDE3A
			FZD4		FBXL20				SMS	CRTC3		CPNE3	SLC19A2			CP	PPP6C	SCD	ERI2	ENTPD3	SLC4A4	PDGFRB
			GAPVD1		FDX1L				SNRK	CSE1L		CPNE4	SLC25A16			CPEB1	PRPF40A	SEC61A1	ESCO2	EPM2AIP1	SLC5A6	PDS5B
			GLG1		FKBP9				SOX6	CSNK2A1		CPSF6	SLC35A3			CPEB2	PSAP	SERBP1	ETV5	ERBB2	SLC6A1	PGM1
			GLIPR1		FLT1				SP1	CTSB		CPXCR1	SLC4A4			CPNE4	PSPC1	SERTAD2	FAF2	ERCC1	SLC6A15	PGM3
			GLTSCR2		FNBP1				SPNS1	CUL5		CREB3L2	SLC6A15			CPXCR1	PTEN	SHOC2	FAM102A	EXT2	SMAD2	PHIP
			GLYAT		FNDC4				STAG2	CYB5A		CRIPT	SLC7A11			CREB3L2	PTPN4	SIRT1	FAM102B	F10	SNAP23	PI4K2B
			GNAQ		FOXP2				STMN2	CYP11A1		CRYZ	SMS			CRIPT	QKI	SLC16A10	FAM109B	F13A1	SNX30	PIK3R2
			GNG10		FOXRED2				STRN3	CYP2S1		CSNK1A1	SNX30			CRTC3	RAB11A	SLC25A16	FAM110B	F2RL2	SOX13	PKNOX2
			GOLM1		FUBP1				SUB1	DAP		CSNK2A1	SOX5			CST3	RAB3GAP2	SLC26A11	FAM118A	F5	SOX6	PLA2G12A
			GOT2		FXR1				SVIL	DARS		CTAGE5	SOX6			CTBP2	RAB3IL1	SLC35F1	FAM120B	FADS1*	SPOCD1	PLEKHO2
			GPAM		FZD4				SYNCRIP	DCLK1		CTBP2	SRGAP1			CTDNEP1	RAD21	SLC38A4	FAM126B	FAM110B	SRGAP1	PLXNA1
			GPC4		GABRB2				SYNGAP1	DCT		CTDSPL2	SSFA2			CTDSPL2	RAP1B	SLC39A13	FAM13A	FAM118A	SRGAP3	PPM1E
			GPC5		GAL3ST4				TAF11	DCTN3		CTH	ST3GAL6			CTH	RAPGEF2	SLC5A3	FAM162B	FAM134A	ST8SIA1	PPP1R12A
			GPR116		GALNT8				TBX21	DCTN4		CTHRC1	ST8SIA4			CTSB	RASSF1	SLC6A1	FAM204A	FAM134C	STOX2	PPP3CB
			GPR180		GAPVD1				TET1	DCUN1D4		CUL2	STOX2			CTTNBP2	RBM26	SLC7A11	FAM20A	FAM168A	STX3	PPP3R1
			GRK4		GBA				TFAP2C	DCUN1D5		CUL3	STXBP5			CWC22	RBM47	SLC9A7	FAM63B	FAM172A	STXBP5	PPP6C
			GRSF1		GCFC2				TMED9	DDB2		CUL5	STYX			CXXC1	RCN2	SLCO3A1	FAM71F2	FAM204A	STYX	PRKAR1A
			GSK3B		GCLC				TMEM236	DDX46		CYB5A	SYNCRIP			CYB5A	RIMKLB	SMAD2	FAM84A	FAM46A	SUB1	PRPF40A
			GSR		GCNT1				TMEM44	DGKE		DARS	TAF9B			CYB5R3	RLF	SMAD5	FASTK	FAM71F2	SUCLG2	PRRX1
			GUCY1A3		GFRA2				TMEM86A	DHX36		DAZAP2	TBC1D15			CYCS	RLIM	SMG1	FASTKD2	FAM83H	SYNCRIP	PTGFRN
			H2AFV		GHDC				TNFRSF11A	DIO2		DBT	TBL1XR1			DAP	RMND5A	SNX12	FBXL18	FAM84A	SYT1	PTPN4
			HAUS6		GINS4				TNFRSF1A	DMD		DCLK1	TET1			DAPK2	RNF125	SP1	FBXL20	FAM86B1	TAF9B	PUM2
			HBS1L		GJC1				TRAK2	DMRT2		DCLRE1B	TFAP2C			DBT	RNF146	SRSF1	FBXO28	FARP1	TARBP2	QKI
			HCFC2		GLA				TRAM2	DNAJA2		DCUN1D4	THAP2			DCAF4	RORB	SSSCA1	FBXO47	FBXL18	TGDS	RAB11A
			HDAC2		GLIS2				TSFM	DNAJA4		DCUN1D5	TMEM106B			DCLK1	RUNX1	ST8SIA4	FGFR1OP	FBXO28	THBS1	RAB32
			HDX		GLIS3				TSPAN4	DNAJC15		DDX46	TMEM135			DCPS	S1PR1	STAG1	FICD	FBXO47	THOC2	RAB4A
			HECW2		GLYAT				TSPAN9	DPCR1		DECR1	TMEM64			DCT	SACM1L	STK32B	FKBP9	FBXO9	TIA1	RANBP9
			HELLS		GM2A				TTC14	DRG1		DGKE	TMEM86A			DCUN1D2	SAMD12	STOX2	FNBP1L	FGF13	TIMM17B	RAP1B
			HELZ		GNG7				TTYH2	DYRK3		DHX36	TNKS2			DCUN1D4	SCAI	SYT1	FOXJ3	FGFR1OP	TMEM135	RAP2B
			HHIPL1		GPC5				UACA	ECD		DIAPH2	UBE2W			DCUN1D5	SCD	TBC1D25	FOXRED2	FKBP15	TPP1	RAP2C
			HIAT1		GPR153				UBIAD1	ECHDC3		DIO2	UBN2			DDX46	SCHIP1	TET1	FRZB	FKBP9	TRHDE	RAPGEF2
			HMGCS1		GPR176				UBN2	EDARADD		DLD	UBR3			DECR1	SCOC	TFDP2	FSTL1	FLCN	TTL	RARB
			HNRNPA3		GPR180				UCK2	EEPD1		DLG1	UCK2			DGKE	SEMA4F	THAP2	FUBP1	FLT1	TXLNA	RASGRP3
			HNRNPD		GRAMD1B				USP34	EFCAB6		DMD	USP25			DHFR	SERPINE1	TLK2	FYN	FNBP1	TXLNG	REEP3
			HNRNPH3		GRSF1				USP6NL	EFNB2		DMTF1	USP3			DHTKD1	SERTAD2	TMEM64	FZD4	FOXJ3	UBN2	REV1
			HNRNPU		GSTM3				VAPB	ELF4		DMXL2	USP9X			DHX36	SGTB	TRAPPC8	FZD6	FOXRED2	UFM1	RLIM
			HPGDS		GTF2A2				VASH2	ELK4		DNAJC19	WAPAL			DIAPH2	SHOC2	TRIM23	FZD8	FRK	USP12	RUNX1
			HSD17B12		GTF2H3				VEGFA	EPM2AIP1		DNM3	WHSC1L1			DLST	SIRT1	TSTD2	GABBR1	FXYD5	USP47	S100PBP
			HSDL2		GUCY1A3				VPS13A	EPRS		DOPEY1	WNK1			DMGDH	SLC16A7	TXLNG	GABRE	FZD4	UTRN	SATB1
			HSPA14		GYG2				VPS37C	ERBB2		DPM1	WNK3			DMTF1	SLC19A2	UBE2N	GALC	GABBR1	WAPAL	SBF1
			IBTK		H6PD				ZDHHC21	ERBB4		DPYSL3	VPS37B			DNA2	SLC25A36	UBE2NL	GAPVD1	GAL3ST4	VASH2	SCN2A
			IDH3A		HAUS6				ZFP36	ERCC1		DUSP18	VSIG10			DNM3	SLC25A4	UBE2W	GAS7	GALM	WDFY4	SCN9A
			IGF1		HBS1L				ZFP36L1	ESCO1		DYNC1I1	WWP2			DPYSL3	SLC35A3	UBE2V1	GGA2	GALNT6	WNK3	SEC14L2
			IGFBP3		HCFC2				ZFYVE26	ETS1		DYRK3	YIPF4			DRG1	SLC35F1	UBN2	GHITM	GAPVD1	XYLT1	SEC62
			IL12RB2		HDAC2				ZMYM2	ETV5		ECHDC1	YTHDF3			DSG3	SLC7A11	UBR5	GINS4	GAS2L3	YTHDF3	SERPINE1
			IPO4		HIST1H3F				ZNF24	EXOC5		EFCAB2	ZFC3H1			DYRK3	SLMAP	UST	GJC1	GAS7	ZFYVE26	SETD9
			IPO5		HIST2H3A				ZNF518B	F13A1		EFCAB6	ZFP36L2			DZIP3	SMAD2	VASH2	GLA	GBA	ZNF200	SGMS2
			IQGAP1		HM13					FADS1*		EIF1B	ZNF451			ECD	SNX30	WNK1	GLG1	GBGT1	ZNF24	SH3GLB1
			IREB2		HMHB1					FADS3		ELK4	ZRSR1			EFCAB2	SOCS2	WNK3	GLIS3	GCFC2	ZNF451	SH3KBP1
			IRS1		HNRNPA2B1					FAF2		ENPEP				EIF4G3	SOGA2	VPS4B	GLP2R	GCNT1		SHOC2
			ITCH		HNRNPU					FAM118A		ENPP2				ELK4	SOX5	XCR1	GLYAT	GDAP2		SIDT2
			ITGA3		HOXD1					FAM120B		ENTPD3				ELOVL6*	SOX6	ZFP36L1	GMPPB	GGA2		SIRT1
			ITGA6		HS3ST2					FAM129B		EPDR1				EMCN	SP1	ZFP36L2	GNPTG	GIN1		SLC16A14
			JAKMIP2		HSD11B1					FAM13A		ESYT3				ENG	SPP1*	ZMYM4	GOLGA8F	GJC1		SLC25A36
			JMY		HSD17B12					FAM168A		ETS1				ENPP2	SRGAP1	ZNF24	GOLM1	GK5		SLC29A3
			KANSL1L		HSD17B13					FAM3A		EVX2				EPM2AIP1	ST8SIA4	ZNF638	GPAM	GLG1		SLC30A2
			KAT2B		HSF1					FAM63B		EXOC5				ERBB4	STOX2	ZNF800	GPBP1	GLIPR1		SLC35A3
			KCND2		HSPA14					FASN		EXOSC3				ESCO1	STXBP5		GPR176	GLIPR1L2		SLC35F1
			KCND3		IFITM10					FASTK		EYS				ESCO2	SYNE1		GPR180	GLIPR2		SLC36A1
			KCNIP2		IKBKB					FASTKD2		FABP4				ESR2	TAF9B		GPRIN3	GMPPB		SLC38A7
			KCNJ5		IL7					FBXL18		FADS3				ESYT3	TARDBP		GPT2	GNA12		SLC5A3
			KCTD7		IMPACT					FBXL20		FAF2				EVL	TBL1XR1		GREB1L	GNG7		SLC6A15
			KDELR1		IPO11					FBXO47		FAM102B				EVX2	TDRD6		GSTM3	GNPTG		SLC7A11
			KIAA0226		IRS1					FBXW7		FAM126B				EXOC5	THBS2		GUCY1A3	GPAM		SMAD2
			KIAA0930		ITIH5					FDX1L		FAM129B				EXOSC8	THBS4		H2AFV	GPBP1		SNAPC3
			KIAA1429		KANSL1L					FGFR1OP		FAM161A				EYS	TLK2		H6PD	GPC4		SNX29
			KIAA1432		KAT2B					FICD		FAM162B				F10	TM9SF3		HADHB	GPR153		SNX30
			KIAA1958		KCNQ3					FKBP10		FAM168A				F5	TMEM106B		HAUS6	GPRIN3		SOX13
			KIAA2018		KIAA1429					FKBP9		FAM180A				FABP4	TMEM135		HBP1	GSDMB		SRGAP3
			KIF3A		KIAA1462					FLT1		FAM204A				FADS1*	TMEM47		HCFC2	GSR		SSR3
			KIFC1		KIAA1522					FLVCR2		FAM21C				FAF2	TMEM64		HDAC2	GSTM5		ST8SIA1
			KLHDC1		KIAA1958					FNBP1L		FAM46A				FAIM	TNF		HDX	GTF2I		ST8SIA4
			KLHL15		KIAA2018					FOXP2		FAM63B				FAM109B	TNFRSF11B		HECTD1	GTF3C3		STAG2
			KLHL23		KIF21A					FRA10AC1		FAM71F2				FAM120B	TRAK2		HECW2	H1F0		STOX2
			LAPTM5		KIF3A					FRK		FAM84A				FAM126B	TRIM3		HEY2	H2AFV		STXBP5
			LASP1		KIF3C					FRZB		FAR1				FAM133B	TSFM		HFM1	H6PD		STYX
			LETMD1		KIF7					FSIP1		FBXL20				FAM162B	TTC39B		HHIPL1	HAVCR2		SUCLG2
			LGI2*		KLHL8					FTL		FBXO11				FAM172A	TTLL7		HIGD1A	HCAR1		SYPL1
			LIN7A		LAPTM5					FXYD5		FBXO28				FAM20A	TULP4		HIST1H2AG	HDAC2		TBC1D15
			LIN7C		LAX1					FYN		FBXO34				FAM46A	UBA6		HSD11B1	HDAC7		TBL1XR1
			LMOD1		LCP1					FZD4		FBXO47				FAM63B	UBE2N		HSD17B12	HDC		TET1
			LONP2		LGR4					FZD8		FBXO9				FAM71F2	UBE2T		IGF1	HECTD1		THBS2
			LRP10		LHFPL2					GABBR1		FCGR2B				FAM84A	UBE2W		IGF2BP3	HECW2		TIA1
			LRPPRC		LILRB4					GABRB2		FERMT2				FAR1	UBN2		IGFBP4	HHIPL1		TIMP2
			LRRC40		LIN7A					GABRE		FGF13				FASN	UBR2		IQSEC2	HINFP		TMEM106B
			LRRIQ3		LIPA					GAL3ST4		FGFR1OP				FASTKD2	USP47		IRF2BP2	HIST1H2AG		TMEM135
			LRRN4CL		LOXL2					GALC		FICD				FBXL18	USP6NL		IRF5	HIST2H3A		TMEM86A
			LUM		LPAR2					GALNT6		FKBP15				FBXO11	USP9X		ITCH	HM13		TNIP1
			LYVE1		LPHN2					GALT		FKBP9				FBXO4	WNK1		ITGA3	HNRNPA3		TNXB
			MAD2L1		LPXN					GAPVD1		FOXJ3				FBXO47	WNK3		JAM2	HNRNPD		TRAM2
			MAGOHB		LRP10					GAS7		FOXP2				FBXO9	XYLT1		KANSL1L	HSD11B1		TRDN
			MAN2B2		LRRC34					GBA		FRA10AC1				FGF14	YIPF4		KCND2	HSD17B12		TRIM23
			MAOB		LRRC40					GCFC2		FRK				FGFR1OP	YIPF6		KCNJ1	HSD3B7		TRIP12
			MAP1A		LRRFIP1					GDAP2		FRZB				FKBP10	YTHDC1		KCNN2	HSF1		TTLL7
			MAP2K4		LRRN3					GFRA2		FUBP1				FLCN	YTHDF2		KCNT2	HSPA14		TTPA
			MAP3K8		LTBP2					GGA2		FZD4				FLT1	YTHDF3		KCTD12	HSPD1		TULP4
			MAPKAPK5		LYPLAL1					GJC1		FZD7				FLVCR2	ZBTB7A		KIAA0226	IGDCC4		UBN2
			MARCH7		LYVE1					GK5		GABRB2				FNBP1	ZDHHC21		KIAA1598	IGFBP3		UBXN2A
			MASP1		MAF					GKAP1		GALNT8				FNBP1L	ZFAND6		KIAA1737	IL10RA		USP14
			MCCC2		MAFG					GLG1		GBA				FOXJ3	ZFP36L1		KIAA1958	IL6R		USP45
			MCOLN2		MAGI1					GLP2R		GCFC2				FOXP2	ZFP36L2		KIAA2018	IMPACT		USP47
			MECOM		MAN1B1					GLTSCR2		GCLC				FPR3	ZNF136		KIF13A	IPP		UST
			MED12L		MAP1A					GLYAT		GDAP2				FRA10AC1	ZNF200		KLHL15	IQGAP1		VAT1
			MED6		MAPK6					GM2A		GFRA2				FRK	ZNF207		KLHL23	IQSEC2		WDR1
			MEF2C		MAPK8IP1					GNAQ		GHITM				FRZB	ZNF24		KLHL24	IRAK1		WDR44
			METTL10		MAPKAPK3					GNG7		GIN1				FSIP1	ZNF292		KLHL5	IRF2BP2		WDR70
			METTL15		MARC1					GNPAT		GINS4				FSTL1	ZNF302		KLHL8	ISCA1		VIM
			MFAP5		MARCH7					GNPDA2		GJC1				FXR1	ZNF471		KPNA5	ISLR		WIPF1
			MFSD6		MCC					GOLGA4		GK5				FYN	ZNF597		LAMP3	ITGA3		WNK3
			MIB1		MCM3					GOLM1		GLIPR1L2				FZD4	ZNF613		LANCL1	ITGAV		VOPP1
			MID2		MCOLN2					GPC1		GLIS3				GABRB2	ZNF654		LARP4	JAKMIP2		XPO1
			MITF		MED12L					GPC4		GLYAT				GALC	ZNF655		LASP1	JDP2		YES1
			MKI67		MED31					GPD1L		GNA12				GALM	ZNF791		LETMD1	JMY		YTHDC1
			MKKS		MED6					GPR137B		GNAI1				GALNT6	ZNF800		LGI2*	KCNJ1		YTHDF3
			MLLT10		MEF2C					GPRIN3		GNAQ				GAPVD1	ZSCAN12		LIMK1	KCNJ5		ZBTB7A
			MLLT3		MEGF8					GRAMD1B		GNG7				GAS2L3			LONP2	KCNQ3		ZDHHC17
			MMP2		METAP2					GRK4		GOLGA4				GAS7			LRCH2	KCTD7		ZDHHC21
			MNT		MFAP4					GRN		GOLGA7				GBAS			LRP1B	KDELR1		ZFC3H1
			MOAP1		MFHAS1					GSK3B		GOLGA8F				GCNT1			LRPPRC	KIAA0226		ZFP36L1
			MPLKIP		MFSD6					GSR		GPAM				GDAP2			LRRFIP1	KIAA1432		ZFP36L2
			MPP7		MGEA5					GSTM5		GPBP1				GFRA2			LTBP2	KIAA1462		ZFYVE26
			MR1		MID2					GTF2A1		GPC5				GHITM			LUM	KIAA1586		ZNF200
			MRPL19		MKKS					GTF2A2		GPNMB				GINS4			MAP1B	KIAA1737		ZNF507
			MRPS14		MKX					GTF2I		GPR116				GJC1			MAP3K12	KIF3C		ZNF770
			MSH3		MLLT3					H1F0		GPR137B				GLIPR1			MAP3K8	KIN
			MTMR1		MMP14					H2AFV		GPR180				GLIPR1L2			MAPK13	KLHL23
			MTMR10		MON1B					HAUS6		GPRIN3				GLIPR2			MAPK6	LAX1
			MYCBP		MPDZ					HBS1L		GRK4				GLIS3			MAPK8	LDHD
			MYCT1		MPLKIP					HDAC2		GRSF1				GLYAT			MAPKAPK5	LHFPL2
			MYNN		MPV17					HDAC4		GSK3B				GM2A			MARCH3	LILRA6
			MYO5A		MR1					HHIPL1		GSR				GNA12			MBD4	LIN7C
			MYO9B		MSI2					HMGN1		GTF2A1				GNAI1			MCC	LMOD1
			MYOF		MTERFD1					HNRNPA2B1		GTF2H1				GNAQ			MED12L	LONP2
			NAA38		MTMR10					HNRNPR		GTF3C3				GNPDA2			MED31	LOXL2
			NAALAD2		MYCT1					HS1BP3		GUCY1A3				GNPTG			MED6	LOXL3
			NARG2		MYH15					HSD11B1		GYG2				GOLGA6L9			METTL10	LPAR2
			NAT8L		MYO10					HSD17B12		HBP1				GOLGA7			METTL15	LRP10
			NBEAL1		MYO7A					HSF1		HCFC1				GOLGA8F			MFAP2	LRRC34
			NBN		MYOZ3					HSPA14		HCFC2				GOT2			MFAP5	LRRIQ3
			NCAM2		NAAA					HTRA1		HDAC2				GPAM			MFSD6	LRRN1
			NCKAP1		NAALAD2					IBTK		HDAC4				GPBP1			MGST1	LTBR
			NDUFA5		NAPEPLD					IDH3A		HDDC2				GPC4			MIB1	LYVE1
			NDUFS1		NAT8L					IDS		HDX				GPC5			MKLN1	MAF
			NEDD4L		NBPF10					IFITM10		HECTD1				GPD1L			MKNK1	MAP2K4
			NEGR1		NBPF16					IL6R		HELLS				GPR176			MLXIP	MAPK13
			NETO1		NBPF9					IPO11		HERC4				GPRIN3			MMAA	MAPK6
			NFATC4		NCAPH					IPO5		HEXA				GRAMD1B			MMP14	MAPK8IP1
			NKAP		NCKAP1					IPP		HEY2				GRSF1			MMP2	MAPKAPK5
			NLGN1		NDUFS1					IREB2		HFM1				GSK3B			MON1B	MARC1
			NLN		NEDD4L					ISLR		HIAT1				GSR			MPLKIP	MCC
			NOL6		NEU3					ITCH		HIBCH				GSTM3			MPP7	MCCC2
			NRAS		NKTR					ITFG1		HIGD1A				GTF2A1			MR1	MED31
			NRK		NLN					ITGA3		HIST1H2AG				GTF2A2			MRPS14	MED6
			NSA2		NPHP3					ITGA6		HIST1H2BH				GUCY1A3			MSH3	MEGF8
			NSD1		NPTX1					ITIH5		HLA-DMB				GYG2			MSL2	MET
			NUDT12		NR2C2AP					JAK2		HMGA1				GYS1			MSMO1	METAP2
			OCLN		NR3C1					JDP2		HMGCS1				H6PD			MSR1*	METTL10
			OPA1		NRIP1					JMY		HNRNPD				HADHB			MTMR11	METTL15
			ORMDL3		NSL1					KAT8		HNRNPR				HAUS6			MTUS1	MFAP2
			OSBPL1A		NUDT3					KCNIP2		HSD11B1				HBP1			MYH10	MFGE8
			OXR1		NUTF2					KCNJ1		HSD17B12				HBS1L			MYNN	MFSD6
			P4HA2		OBFC1					KCNQ3		HSDL2				HDAC4			NAA38	MICB
			PAIP2B		OPA1					KCTD7		HSF2				HDX			NAALAD2	MKI67
			PALM2-AKAP2		ORMDL1					KDELR1		HSPA5				HECW2			NBEA	MKKS
			PAPLN		OXNAD1					KIAA0226		HSPBAP1				HELLS			NBEAL1	MKLN1
			PAPPA		P2RX6					KIAA0922		IDH3A				HEY2			NCAPH	MKNK1
			PAWR		P2RX7					KIAA0930		IDI1				HHIPL1			NCEH1	MLLT3
			PCBD2		PALM2-AKAP2					KIAA1429		IDS				HIBADH			NCKAP1	MOB3A
			PCDH17		PAN2					KIAA1432		IL12RB2				HIBCH			NDUFA9	MOXD1
			PCF11		PAN3					KIAA1522		IL6R				HIGD1A			NEDD4L	MPLKIP
			PCLO		PANX1					KIAA1737		IL7				HIST1H2AG			NEK6	MPP7
			PCM1		PAPLN					KIAA1958		IMPACT				HIST1H3F			NETO1	MR1
			PCNX		PAPPA					KIN		INPP1				HMGCS1			NEU3	MRPL19
			PCYOX1		PAQR5					KLF16		IPO11				HNRNPA2B1			NFATC4	MRPL30
			PDCD4		PAWR					KLHL15		IPO5				HNRNPA3			NLGN1	MRPS14
			PDE3A		PCDH17					KLHL23		IQGAP1				HNRNPR			NOL7	MSH3
			PDE3B		PCLO					KLHL24		IREB2				HSD11B1			NPHP3	MSI2
			PDHX		PCNX					KLHL5		IRF5				HSD17B12			NPHP4	MTA3
			PDZD2		PDDC1					LAPTM5		IRS1				HSPA14			NPR1	MTMR1
			PERP		PDE11A					LARP4		ISOC1				HTT			NR2C2AP	MTMR10
			PFKFB3		PDE4DIP					LAX1		ITCH				IFITM10			NR3C1	MTRF1L
			PGAP3		PDGFRB					LCP1		ITGA6				IGF1			NSL1	MYCT1
			PGM3		PDLIM2					LGI2*		ITGAV				IGF2BP3			NXF3	MYH10
			PGRMC2		PDS5B					LIAS		ITGB2				IGFBP3			OBFC1	MYO10
			PHIP		PDXK					LILRA6		JAK2				IGFBP4			OR51E1	MYO5A
			PHKB		PDZD2					LILRB3		JAKMIP2				IL11RA			ORAI1	MYOZ3
			PHLDB2		PELO					LILRB5		JAM2				IL12RB2			ORC4	NAA38
			PIAS2		PFKFB2					LIMK1		JMY				IL6R			OXR1	NAPEPLD
			PIK3C2A		PFKFB3					LIN7A		KAT2B				IQGAP1			PAIP2B	NARG2
			PIK3CA		PGAP1					LMTK2		KCND2				IREB2			PALM2-AKAP2	NBPF10
			PIK3CB		PGAP3					LONP2		KCNN2				IRF2BP2			PAN3	NCAM2
			PKN2		PGM3					LOXL2		KCNQ3				IRS1			PAPPA	NCDN
			PLA2G12A		PHF19					LPL		KCTD7				ITGA6			PAQR5	NCKAP1
			PLCB1		PHF20L1					LRG1		KIAA1109				ITGB5			PAWR	NCOA2
			PLCL1		PHLDA1					LRP10		KIAA1429				ITIH5			PCBD2	NCSTN
			PLEKHG4		PHLDB2					LRPPRC		KIAA1432				KAT2B			PCMTD1	NDUFA5
			PLXNA1		PIK3C2A					LRRFIP1		KIAA1586				KCND2			PCYOX1	NDUFS1
			PNPLA3		PIP5K1C					LSM5		KIAA1598				KCND3			PCYT2	NECAB3
			POLI		PKN2					LSM6		KIAA1958				KCNJ5			PDCD1LG2	NEDD4L
			PPM1E		PKNOX2					LTBP4		KIAA2018				KCNQ3			PDE3A	NEGR1
			PPP2CA		PLA2G12A					LYPLAL1		KIF18A				KCNQ5			PDE3B	NEU3
			PPP6R3		PLCB1					MAD2L1		KIF21A				KCNT2			PDE8A	NKAP
			PPT1		PLCL1					MAF		KIF3A				KCTD7			PDGFB	NKTR
			PRKAR2B		PLEKHO2					MAGEA9		KLHDC1				KIAA0930			PDGFRA	NLN
			PRKCH		PLXDC1					MAN1B1		KLHL24				KIAA1432			PDHX	NMNAT3
			PRKD3		PLXNA1					MAPK13		KLHL5				KIAA1462			PDK1	NOL6
			PRPF38A		PLXND1					MAPK8		KLHL8				KIAA1522			PDP1	NOSTRIN
			PRPF39		PMP22					MARVELD1		LAX1				KIAA1586			PDS5A	NR2C1
			PRPF4B		PNPLA3					MBD1		LDB2				KIAA1598			PERP	NR3C1
			PRRX1		POLK					MCC		LDHB				KIAA1958			PEX13	NRAS
			PSTPIP1		PPL					MCCC2		LETMD1				KIF27			PFKFB3	NRIP1
			PTEN		PPM1B					MCOLN2		LGI2*				KIF3C			PGAP1	NRK
			PTPLB		PPM1E					MED12L		LGR4				KLHL15			PGM5	NSD1
			PTPN4		PPP1R12A					MED31		LHFPL2				KLHL24			PHF19	NSL1
			QKI		PPP1R14B					MEGF8		LIN7A				KLHL5			PHIP	NUB1
			QSOX1		PPP2R1A					METAP2		LIN7C				KLHL8			PHKA2	NUDT3
			RAB18		PPP2R2D					MFAP2		LPAR1				KPNA5			PIAS2	NUMBL
			RAB33B		PPP3R2					MFAP5		LPHN2				LAMP3			PIK3CA	OBFC1
			RAB3GAP2		PPP6C					MIB1		LRP11				LANCL1			PIK3CB	OCLN
			RALY		PREX2					MKKS		LRPPRC				LCP1			PIK3R3	OIP5
			RAP1A		PRKAR1A					MKX		LRRC34				LETMD1			PIKFYVE	OLFM2
			RAP2B		PRKD3					MLLT3		LRRC40				LGI2*			PKIB	OPA1
			RAP2C		PRPF38A					MLXIP		LRRFIP2				LHFPL2			PLA2G5	ORMDL3
			RAPGEF5		PRR19					MMP14		LSM1				LILRB4			PLCB1	OXER1
			RB1CC1		PRRG3					MMP19		LSM5				LIN7A			PLCL1	OXNAD1
			RBM12B		PSMC4					MOB3A		LSM6				LMTK2			PLEKHO2	P2RX7
			RBM18		PSTPIP1					MOCS1		LTBP2				LONP2			PNPLA3	PAIP2B
			RBM26		PTCD3					MON1B		LTBR				LOXL2			PNPLA8	PAPPA
			RBMS1		PTEN					MPDZ		LYVE1				LPAR1			POLK	PAQR5
			RBMS3		PTPN18					MR1		MAD2L1				LPXN			POLQ	PAWR
			RCHY1		PTPRT					MRPL22		MAFB				LRP10			PPARA	PC
			RCL1		RAB18					MRPS33		MAGI1				LRRC40			PPP1R12A	PCDH12
			RCN2		RAB35					MSH3		MAGOHB				LRRFIP1			PPP2CA	PCDH17
			RGS5		RAB4A					MTA3		MAMDC2				LYRM5			PPP2R1A	PCF11
			RHOBTB3		RABGAP1					MTG1		MAP1B				MAD2L1			PPP6R3	PCLO
			RIMKLB		RALY					MTHFD1L		MAPK6				MAF			PRAF2	PCMTD1
			RLF		RAP2B					MTUS1		MAPK8				MAGI1			PRDM8	PCYT2
			RMND5A		RBM47					MUS81		MAPK8IP1				MAGOHB			PREPL	PDCD1LG2
			RNF144A		RBM48					MYCBP		MAPKAPK5				MAN2B2			PRPF38A	PDE11A
			RNF146		RBM7					MYH15		MARCH7				MAP1A			PRRX1	PDHA1
			RNGTT		RBMS3					MYL9		MARCKS				MAP1B			PSPC1	PDHX
			RPAP2		RCC1					MYOZ3		MATR3				MAP2K2			PTCD3	PDK1
			RPL7L1		RCL1					NANP		MCCC2				MAP3K13			PTEN	PDP1
			RPP14		RCN2					NAT8L		MCM3				MAPK8			PTGER4	PDXK
			RPS14		REEP3					NBEAL1		MCOLN2				MAPKAPK5			PTGES3	PDZD2
			RSPO3		RFC1					NBN		MECOM				MARC1			PTGFRN	PELO
			RSU1		RGS5					NBPF10		MED6				MARCH7			PTK2	PERP
			RTEL1		RIMKLB					NBPF9		MEF2C				MAST2			PTPN3	PEX10
			RTN3		RMND5A					NCEH1		MET				MATR3			PTPN4	PEX2
			RYK		RNF180					NCKAP1		MICB				MCC			PTPRT	PFKFB2
			S1PR1		RNF213					NCOA2		MID2				MED12L			PYCARD	PFKFB3
			SAR1B		RORB					NCS1		MITF				MEF2C			QKI	PGAP1
			SATB1		RPAP2					NDUFA10		MKKS				METAP2			RAB11A	PGRMC2
			SCML1		RPL10L					NDUFAF2		MKLN1				MFAP5			RAB32	PHF19
			SCO1		RPL37					NDUFS1		MLLT10				MFSD12			RAB33B	PHIP
			SCOC		RRN3					NECAB1		MMAA				MFSD6			RAB35	PI4K2A
			SEC62		RSBN1					NECAP2		MOAP1				MID2			RAB3GAP2	PIAS2
			SELT		RUNX1					NEDD4L		MOB3A				MKKS			RABGAP1	PIK3C2A
			SERINC5		RYBP					NEGR1		MOXD1				MKLN1			RAC2	PIKFYVE
			SERPINE1		RYR2					NEU3		MPDZ				MKX			RAD50	PKLR
			SETBP1		S100PBP					NFATC4		MPHOSPH10				MLLT3			RAP2C	PKNOX2
			SETD9		S1PR1					NKAIN2		MPLKIP				MLXIP			RAPGEF2	PLA2G12A
			SGIP1		SAMD13					NKAP		MPP7				MMP14			RAPGEF5	PLBD2
			SGPP2		SASH3					NLGN1		MR1				MMP19			RASA4	PLCL1
			SH3KBP1		SBF1					NLGN2		MRPL19				MMP2			RB1	PLEKHM2
			SH3PXD2B		SCML1					NOL6		MRPL22				MNT			RBM12B	PLXDC1
			SHOC2		SDHAF2					NPC2		MRPL30				MOB3A			RBM18	PLXNB2
			SHROOM4		SDHD					NPHP3		MRPS36				MOB4			RBM47	PLXND1
			SIRT1		SECISBP2L					NPTX1		MS4A4A				MPI			RBMS3	PMVK
			SLC16A10		SERINC5					NR3C1		MSH3				MR1			RCHY1	PNPLA3
			SLC16A5		SERPINE1					NRAS		MSH4				MRPL22			RCL1	PODN
			SLC16A7		SERPING1					NSD1		MSI2				MRPL30			REEP3	PODXL
			SLC19A2		SETBP1					NSL1		MSL2				MRS2			RGPD4	POTEM
			SLC25A4		SETD9					NUDT12		MSR1*				MSH3			RGPD5	PPARA
			SLC2A9		SF3B1					NUDT3		MTDH				MSL2			RGPD6	PPDPF
			SLC30A6		SF3B5					NUTF2		MTERFD1				MSL3			RGS5	PPFIBP1
			SLC35F1		SFXN3					OGN		MTHFD1				MTDH			RICTOR	PPIL2
			SLC4A4		SGIP1					OIP5		MTHFD2L				MTHFD1			RLIM	PPL
			SLC4A8		SGPP2					OR51E1		MTMR1				MTHFD1L			RNF180	PPM1E
			SLC5A3		SH3GLB1					ORC4		MTSS1				MTMR10			RNF2	PPM1M
			SLC5A6		SHROOM4					ORMDL3		MTX2				MTRF1L			RORB	PPP1R12A
			SLC6A15		SKA2					P4HA3		MUT				MTSS1			RPAP2	PPP2R1A
			SLC9A7		SLAMF8					PAIP2B		MYCT1				MTUS1			RPF2	PPP2R2D
			SLCO3A1		SLC19A2					PALM2-AKAP2		MYEF2				MTX2			RPL37	PPP2R3B
			SLITRK2		SLC25A33					PALMD		MYH15				MYCBP			RPL7L1	PPP6R3
			SLMAP		SLC25A36					PAPPA		MYNN				MYCT1			RPP14	PREPL
			SMAD2		SLC35A3					PARN		MYO5A				MYL9			RRN3	PROSC
			SMAD5		SLC35C2					PAWR		MYOZ3				MYNN			RSPO3	PRPF38A
			SMARCE1		SLC35F1					PCBD2		N4BP2				MYO5A			RYBP	PRRG3
			SMCHD1		SLC46A1					PCLO		NAA38				NAA38			RYK	PSG5
			SMG1		SLC4A4					PCNX		NAALAD2				NAALAD2			RYR2	PSMC4
			SMNDC1		SLC5A3					PCYOX1		NANP				NAT8L			S1PR1	PSTPIP1
			SNAPC1		SLC7A1					PCYT2		NAPEPLD				NBEAL1			SACM1L	PTCD3
			SNAPC3		SLC7A11					PDCD10		NARG2				NCAM2			SAMD12	PTEN
			SNRK		SLC7A8					PDE11A		NBEA				NCKAP1			SAR1B	PTGFR
			SNRNP40		SLC9A1					PDE3B		NBEAL1				NCOA2			SCAI	PTPLB
			SNX13		SLC9A7					PDGFRA		NBN				NCS1			SCAMP2	PTPN18
			SORBS1		SLMAP					PDK1		NBPF10				NDUFA10			SCLT1	PTPN3
			SPP1*		SMAD2					PDP1		NCAM2				NDUFA5			SCRN3	PTPRT
			SRP9		SMARCE1					PDZD2		NCEH1				NDUFAB1			SDHAF2	QSOX1
			SRPX2		SMC5					PELO		NCKAP1				NDUFS1			SEC16A	RAB13
			SRSF1		SMG9					PEX7		NCOA2				NECAB1			SEC62	RAB18
			SSFA2		SMNDC1					PFKFB3		NDUFA5				NECAB3			SECISBP2L	RAB39A
			ST3GAL6		SNAP23					PGAP1		NDUFA9				NEDD4			SEMA3G	RAB3IL1
			ST5		SNAPC3					PGM3		NDUFB5				NEDD4L			SERINC1	RAB4A
			ST8SIA4		SORD					PHF19		NDUFS1				NEGR1			SERPINB8	RAB5A
			STAMBPL1		SPC24					PHIP		NECAB1				NEK6			SERPINE1	RAD50
			STOX2		SRGAP1					PHKA2		NEDD4				NEU3			SERPING1	RANBP2
			STXBP5		SRM					PIK3C2A		NEFM				NFYB			SERPINI1	RARB
			SYDE2		SRSF1					PIK3CB		NEGR1				NIPSNAP3B			SERTAD2	RARS2
			SYNCRIP		ST8SIA1					PIK3R3		NEMF				NKAP			SETBP1	RASA4
			SYT1		STAG2					PINK1		NETO1				NLGN1			SETD9	RASGRP3
			TACR1		STAT2					PKDREJ		NEU3				NLN			SF3B5	RASIP1
			TAF1D		STOX2					PKNOX2		NFYB				NMNAT3			SGIP1	RBCK1
			TANK		STRN3					PLA2G12A		NGDN				NOL7			SGTB	RBM24
			TAS2R13		STX3					PLA2G7*		NKAP				NOX4			SHOC2	RBM48
			TBC1D15		SUMO2					PLAUR		NLGN2				NPR1			SHROOM4	RBM7
			TBC1D16		SYNCRIP					PLCB4		NLN				NQO1			SIKE1	RBMS1
			TBL1XR1		SYT1					PLCL1		NPHP3				NR3C1			SKA2	RCL1
			TDRD6		TADA2A					PLXNA1		NPTX1				NSL1			SLC16A10	RCN2
			TFDP2		TAF1D					PMP22		NR3C1				NUDT12			SLC16A7	RCVRN
			THAP2		TBC1D16					PNPLA3		NRAS				NUP88			SLC17A7	REEP3
			THBS1		TBC1D19					PNPT1		NRIP1				OBFC1			SLC17A9	RGPD1
			THUMPD1		TBC1D25					PODN		NSD1				OCLN			SLC25A33	RGPD5
			TLK2		TFDP2					PODXL		NSL1				OGN			SLC2A9	RGPD6
			TM9SF3		THAP2					POLR3F		NUBPL				OIP5			SLC35B1	RHEB
			TMEM106B		THBS1					POTEM		NUDT12				OLFM2			SLC35C2	RHOF
			TMEM135		TLK2					PPARA		NUDT3				OPA1			SLC36A1	RICTOR
			TMEM231		TM9SF3					PPDPF		NUP35				ORC4			SLC43A3	RIMKLB
			TMEM47		TMCO1					PPFIBP1		NUP54				ORMDL1			SLC4A4	RLIM
			TNFRSF11A		TMEM86A					PPM1E		NUP88				OXCT1			SLC4A8	RNF125
			TPCN2		TMEM98					PPP1R12A		OBFC1				OXR1			SLC4A9	RNF144A
			TPD52L1		TNFRSF10D					PPP2CA		ODAM				P4HB			SLC5A3	RNF180
			TRAK2		TPCN2					PPP2R1A		OLIG3				PAIP2B			SLC6A15	RNF213
			TRIM23		TRA2A					PPP2R2A		OPA1				PALM2-AKAP2			SLC6A8	RNF24
			TRIM47		TRAM2					PPP3CB		ORMDL1				PANX1			SLC7A1	RNFT1
			TRMT1L		TRDN					PPP3R1		OXR1				PAPLN			SLC7A8	RORB
			TSHZ2		TRHDE					PPP3R2		P2RX7				PAPPA			SLC9A7	RPAP2
			TTBK2		TRIM14					PPP6C		P4HA2				PAQR5			SMAD5	RPF2
			TTC14		TRIM49					PPP6R3		PAIP2				PARN			SMG1	RPL10
			TTC37		TRIM62					PREPL		PALM2-AKAP2				PAWR			SMNDC1	RPP25
			TTL		TRIP12					PRPF40A		PAN3				PCCB			SNRK	RPS14
			TTLL7		TSHZ2					PRPF4B		PAPPA				PCDH17			SNX12	RPS3A
			TTPA		TSPAN17					PRRG3		PAWR				PCF11			SNX13	RRM2
			TWIST1		TTC14					PRRX1		PCBD2				PCLO			SOCS2	RTN3
			TYW5		TTL					PSAP		PCBP3				PCSK1			SORD	RUNX1
			UBA5		TXLNG					PSPC1		PCCB				PDCD4			SOX13	RWDD2A
			UBE2W		UBA5					PSTPIP1		PCDH17				PDE3A			SOX5	RYBP
			UBE2V1		UBA6					PTEN		PCLO				PDE3B			SOX6	RYK
			UCHL5		UBE2T					PTPRT		PCMTD1				PDGFB			SPAG16	S100PBP
			UFM1		UBIAD1					PTRF		PCNX				PDGFRA			SPARCL1	S1PR1
			USP14		UBN2					QKI		PCNXL2				PDHA1			SPG20	S1PR2
			USP45		UBXN2A					QSOX1		PCSK1				PDIA4			SRGAP1	SAA4
			USP47		UCHL5					RAB31		PDDC1				PDK1			SRGAP3	SAMD4B
			USP6NL		UFL1					RAB35		PDE11A				PDS5A			SRSF1	SAR1B
			UTRN		ULK3					RALY		PDE3A				PDZD2			ST13	SCD
			UTY		UQCRB					RAP2B		PDE3B				PELO			ST3GAL6	SCN4A
			WDR31		USP25					RAPGEF2		PDGFB				PERP			ST8SIA4	SCO1
			WHSC1L1		USP3					RB1CC1		PDGFRA				PEX10			STAG1	SCOC
			WIPF1		USP47					RBM26		PDHX				PEX2			STK11	SCYL2
			WNK1		USP6NL					RBM48		PDK1				PEX7			STK11IP	SDHAF2
			VPS18		VAPB					RBM7		PDP1				PFKFB3			STOM	SEC14L2
			XPO1		VASH2					RBMS3		PDS5A				PGAP1			STX3	SEC62
			XYLT1		VASN					RCL1		PDS5B				PGLS			STXBP5	SECISBP2L
			YIPF4		WDFY4					RCVRN		PELO				PGM3			STYX	SELT
			YIPF6		WDR1					RGS1		PEX10				PGRMC2			SUMO2	SEMA3G
			ZC3H15		WDR70					RGS5		PEX13				PHF19			SVIL	SERINC1
			ZDBF2		WNK1					RHOBTB3		PEX2				PHF20L1			SYDE2	SERINC5
			ZDHHC21		VNN1					RICTOR		PEX7				PHIP			SYT1	SERPINE1
			ZFAND6		VPS13A					RLIM		PFDN2				PHKA2			TACR1	SERPING1
			ZFP36L2		VWA1					RMND5A		PHF20L1				PHLDA1			TAF1D	SERPINI1
			ZFYVE26		WWP2					RNF144A		PHIP				PHLDB2			TARDBP	SERTAD2
			ZFYVE9		XCR1					RNF146		PHLDA1				PHYH			TAX1BP1	SF3B1
			ZMYM2		XPA					RNF2		PHLDB2				PI4K2A			TBC1D15	SFXN3
			ZMYM4		XRRA1					RNF213		PHLPP1				PI4K2B			TBC1D2	SGIP1
			ZNF143		ZC3H11A					RNGTT		PI4K2A				PIAS2			TERF2IP	SGPP2
			ZNF200		ZDHHC21					RORB		PI4K2B				PIK3CA			TFAP2C	SH3PXD2B
			ZNF24		ZDHHC23					RPAP2		PIK3C2A				PIK3CB			TFDP2	SHCBP1
			ZNF25		ZFP36L1					RPL37		PIK3CA				PIK3R3			TGIF2LX	SHISA2
			ZNF253		ZFYVE9					RPP14		PIK3CB				PIP5K1C			THAP2	SHISA3
			ZNF292		ZMYM2					RPS11		PIK3R4				PKD1L1			THBS1	SHMT1
			ZNF320		ZMYM4					RPS14		PIKFYVE				PKIB			THBS2	SKA2
			ZNF354C		ZNF189					RPS9		PKD1L1				PKLR			TIMP2	SLAMF8
			ZNF564		ZNF347					RRAGC		PKN2				PKN2			TIPARP	SLC12A2
			ZNF597		ZNF354C					RRBP1		PLA2G12A				PKNOX2			TJP1	SLC13A3
			ZNF613		ZNF451					RRN3		PLAUR				PLA2G12A			TM7SF2	SLC16A10
			ZNF626		ZNF471					RSBN1		PLBD2				PLA2G5			TM9SF3	SLC16A13
			ZNF638		ZNF613					RSPH3		PLCB1				PLBD2			TMEM106B	SLC16A14
			ZNF695		ZNF791					RSU1		PLCL1				PLCB1			TMEM133	SLC16A7
			ZNF721		ZNF84					RTN3		PLEKHF2				PLCB4			TMEM135	SLC19A2
			ZNF790		ZSCAN12					RUNX1		PLEKHO2				PLCL1			TMEM14B	SLC25A16
			ZRSR1							RYBP		PLOD2				PMP22			TMEM43	SLC25A33
			ZWINT							SAA1*		PNPLA3				PMVK			TMEM44	SLC30A2
										SAMD12		PNPLA8				PNISR			TMEM59	SLC35A3
										SCAI		POLK				PNPT1			TMEM64	SLC38A7
										SCAMP2		POLR3F				PODXL			TMEM86A	SLC39A13
										SCLT1		POTEM				POTEM			TMTC1	SLC43A3
										SCN2A		PPARG				PPARA			TNF	SLC46A1
										SCO1		PPIL2				PPIL2			TNFRSF10D	SLC48A1
										SCOC		PPM1B				PPL			TRHDE	SLC4A8
										SCRN1		PPM1E				PPM1E			TRIM3	SLC6A1
										SCRN3		PPP1R12A				PPP1R12A			TRIM62	SLC7A1
										SCYL2		PPP2CA				PPP2CA			TSEN2	SLC7A11
										SDHAF2		PPP2R5A				PPP2R5A			TSG101	SLC9A7
										SEC14L1		PPP3R2				PPP3CB			TSHZ2	SLCO2B1
										SEC62		PPP6C				PPP3R2			TSPAN9	SLCO3A1
										SECISBP2L		PPP6R3				PPP6C			TSTD2	SLIT3
										SEMA4F		PREPL				PPP6R3			TTBK2	SMARCE1
										SENP6		PREX2				PRKCH			TTC37	SMG9
										SERINC1		PRKCH				PROSC			TTC39B	SMPD1
										SERPINA5		PRPF40A				PRPF38A			TTC7A	SNAP23
										SERPINE1		PRPF4B				PRR11			TTL	SNX30
										SF3B5		PRR11				PSAP			TXLNB	SORBS1
										SFXN3		PSAP				PSPC1			UBA6	SORBS3
										SGIP1		PSMC4				PTCD3			UBE2N	SORD
										SGTB		PSMC6				PTEN			UBE2T	SOX13
										SH3PXD2B		PTEN				PTPLB			UBE2W	SPC24
										SHOC2		PTER				PTPN3			UBN2	SPG11
										SHROOM4		PTGES3				PTPN4			UBR5	SPIB
										SIGLEC1		PTPN4				PUM2			UBXN2A	SPOCD1
										SLC12A2		PTPRM				PXDNL			UCHL1	SRGAP3
										SLC16A7		PUM2				QKI			UCK2	SRM
										SLC17A7		QKI				QSOX1			ULBP2	SRPX2
										SLC17A9		RAB18				RAB11A			ULK3	SRSF1
										SLC25A16		RAB32				RAB18			UNC5CL	SSR3
										SLC25A36		RAB33B				RAB31			UQCRB	ST13
										SLC25A4		RAB3GAP2				RAB32			USP20	ST5
										SLC28A3		RAB4A				RAB39A			USP3	STAT2
										SLC2A9		RABGGTB				RAB3GAP2			USP34	STOX2
										SLC35C2		RAD21				RAD21			USP45	STRN3
										SLC36A1		RALGAPA1				RALY			USP47	SULT1E1
										SLC37A2		RANBP17				RANBP9			USP6NL	SUMF2
										SLC37A4		RANBP9				RAP1A			USP9X	SUMO2
										SLC38A7		RAP1A				RAP2B			UTP23	SYNPO
										SLC46A1		RAP1B				RAP2C			UVRAG	TADA2A
										SLC6A15		RAP2B				RAPGEF1			VAMP3	TAF1D
										SLC7A1		RAP2C				RAPGEF2			VAPB	TAF9B
										SLC7A11		RAPGEF5				RASGRF1			VASH2	TAX1BP1
										SLC9A7		RARB				RASGRP3			WBP1	TBC1D16
										SLIT3		RB1CC1				RBM11			WDR1	TBC1D19
										SLITRK2		RBM11				RBM12B			WDR45	TBC1D25
										SMAD2		RBM12B				RBM17			WDR5B	TBCA
										SMAD5		RBM17				RBM18			WHSC1L1	TERF2IP
										SMARCE1		RBM18				RBM47			WNK3	TFDP2
										SMC5		RBM48				RBMS1			VPS13A	TGM5
										SMG1		RBM7				RBMS3			VPS18	THUMPD2
										SMG5		RBMS3				RCC1			VSIG10L	TIA1
										SMPD4		RCHY1				RCHY1			VWA5A	TIMM8A
										SMS		RCN2				REEP4			XRRA1	TMBIM1
										SNCAIP		RERGL				RFTN1			XYLT1	TMCO1
										SNX29		RGS5				RHEB			YES1	TMEM115
										SNX30		RHEB				RHOBTB3			YIPF6	TMEM14B
										SOGA2		RICTOR				RICTOR			YTHDF2	TMEM214
										SORBS1		RIMKLB				RIMKLB			ZBTB7A	TMEM231
										SOX6		RING1				RLIM			ZDHHC1	TMEM44
										SP1		RLF				RMND5A			ZFC3H1	TMEM53
										SRGAP1		RLIM				RNF125			ZFP36L2	TMEM59
										SRGAP3		RMND5A				RNF180			ZFYVE19	TMTC1
										SRPX2		RNF125				RNF213			ZFYVE9	TNFAIP2
										ST13		RNF144A				RNFT1			ZMYM2	TNFRSF11A
										ST5		RNF180				RORB			ZNF25	TNFRSF14
										ST8SIA1		RNF2				RPAP2			ZNF292	TNKS2
										STAMBPL1		RNF213				RPL37			ZNF347	TOR1B
										STOX2		RNF24				RPP14			ZNF354C	TPCN2
										STX3		RNFT1				RPS14			ZNF563	TRA2B
										SUB1		RNGTT				RPS27			ZNF626	TRAPPC8
										SYNCRIP		RORB				RRBP1			ZNF638	TRIM11
										SYT1		RPAP2				RRM2			ZNF71	TRIM3
										TBC1D16		RPF1				RSPH3			ZNF721	TRIM65
										TBCA		RPL10				RSPRY1			ZNF790	TRIP11
										TBL1XR1		RPL37				RSU1			ZNF791	TSHZ2
										TEC		RPP14				RYBP			ZSCAN12	TSPAN9
										TFDP2		RRM2				RYR2				TTC37
										THBS1		RSBN1				S1PR1				TTC39B
										THUMPD1		RSPH3				S1PR2				TTC7A
										TIA1		RSPO3				SAMD12				TTL
										TJP2		RUNX1				SATB1				TTLL3
										TMED3		RYK				SBF1				TTLL7
										TMEFF2		S1PR1				SCNM1				TTYH2
										TMEM106B		SAMD12				SCO1				TWIST1
										TMEM135		SAR1B				SCRN1				TYRO3
										TMEM212		SATB1				SEC14L2				UACA
										TMEM214		SCAI				SEC62				UBA6
										TMEM231		SCD				SELM				UBE2W
										TMTC1		SCHIP1				SELT				UBE4A
										TNF		SCML1				SEMA4F				UBIAD1
										TNFRSF11A		SCN2A				SERBP1				UBQLN4
										TNFRSF14		SCN9A				SERPINB3				UBR2
										TOMM20		SCOC				SETD9				UBXN2A
										TOR1B		SCRN1				SGIP1				UCK2
										TPCN2		SEC62				SGMS2				UFM1
										TRA2A		SECISBP2L				SGPP2				UNC5CL
										TRA2B		SELT				SGTB				UQCRB
										TRAM2		SEMA3G				SH3GL3				UQCRC2
										TRDN		SERINC1				SH3GLB1				USF2
										TRIM11		SERPINB8				SHMT1				USP12
										TRIP12		SERTAD2				SHROOM4				USP3
										TRPV4		SETBP1				SIKE1				USP6NL
										TSPAN6		SF3B1				SIRT1				USP9X
										TSPAN9		SF3B5				SLC13A3				UVRAG
										TSTD2		SGIP1				SLC16A10				WAPAL
										TTBK2		SGSH				SLC16A7				VAPB
										TTC39B		SH3GLB1				SLC25A36				VASN
										TTL		SHCBP1				SLC26A11				WDFY4
										TTLL3		SHOC2				SLC35F1				WDR13
										TTYH3		SHROOM4				SLC35F2				WDR5B
										TULP4		SIKE1				SLC39A8				WDR70
										TXLNA		SIRT1				SLC46A1				VEGFA
										TXLNG		SLC16A10				SLC4A4				WISP2
										UAP1L1		SLC16A7				SLC4A8				VNN1
										UBA5		SLC17A9				SLC5A3				VOPP1
										UBE2N		SLC25A33				SLC5A6				VPS37C
										UBE2W		SLC25A36				SLC6A15				VSIG10L
										UBIAD1		SLC26A11				SLC7A1				VSIG4*
										UBN2		SLC2A9				SLC9A7				VWA1
										UBQLN4		SLC30A6				SLCO3A1				XPNPEP2
										UBR2		SLC35A3				SLCO4C1				XPNPEP3
										UBR5		SLC35F1				SLITRK2				XRRA1
										UCK2		SLC35F5				SLMAP				YIF1B
										UNG		SLC36A1				SMAD2				YIPF2
										USP12		SLC37A4				SMAD5				YIPF4
										USP14		SLC39A8				SMC3				YIPF6
										USP3		SLC4A4				SMG1				ZC3H15
										USP47		SLC5A3				SMNDC1				ZFYVE9
										USP6NL		SLC6A1				SMPD4				ZNF136
										USP9X		SLC6A15				SMS				ZNF189
										UST		SLC7A11				SNAPC3				ZNF200
										UVRAG		SLC9A7				SNX12				ZNF320
										VASN		SLCO3A1				SNX13				ZNF451
										VDAC2		SLCO4C1				SNX30				ZNF471
										WDFY4		SLIT3				SOCS2				ZNF518B
										WDR13		SLMAP				SORBS1				ZNF581
										WDR44		SLMO2				SORD				ZNF595
										WDR70		SMAD2				SOX6				ZNF597
										WDR78		SMAD5				SP1				ZNF613
										WNK1		SMARCE1				SPAG16				ZNF626
										VPS13A		SMC3				SPIB				ZNF638
										VPS37B		SMG1				SRP9				ZNF695
										VPS54		SMNDC1				SRPX2				ZNF703
										VSIG10		SNAPC1				SRSF1				ZNF708
										VWA1		SNRK				SSR3				ZNF71
										XCR1		SNX13				ST3GAL6				ZNF721
										XPNPEP2		SNX25				ST5				ZNF790
										XPNPEP3		SNX29				STAG1				ZRANB2
										XYLT1		SNX4				STAMBPL1				ZRSR1
										YIF1B		SOCS2				STAT2				ZSCAN12
										YIPF6		SOX6				STAU2				ZWINT
										YTHDC1		SPAG16				STOM
										ZDHHC23		SPG20				STOX2
										ZFAND2B		SPTSSA				STRN3
										ZFP36L2		SRGAP1				STXBP5
										ZFYVE26		SRP9				STYX
										ZFYVE9		SRPX2				SUMO2
										ZNF207		SRSF1				SYT1
										ZNF248		ST8SIA1				TACR1
										ZNF415		ST8SIA4				TADA2A
										ZNF419		STAG2				TAF1D
										ZNF451		STAMBPL1				TANK
										ZNF501		STAT2				TARDBP
										ZNF518B		STAU2				TAX1BP3
										ZNF597		STOX2				TBC1D15
										ZNF613		STXBP5				TBC1D16
										ZNF626		STYX				TBC1D19
										ZNF638		SUB1				TBC1D25
										ZNF660		SUCLG2				TBC1D8
										ZNF668		SULT1E1				TCP10
										ZNF706		SUMO2				TFB2M
										ZNF708		SUMO3				TFDP2
										ZNF790		SYDE2				TGFBI
										ZNF84		SYNCRIP				TGIF2LX
												SYPL1				THAP2
												SYT1				THBS1
												TAF1D				THBS2
												TAF7				THUMPD2
												TAF9B				TIA1
												TANK				TIMM8A
												TAPBP				TM7SF2
												TARDBP				TMCO1
												TAS2R13				TMCO4
												TAX1BP1				TMED3
												TBC1D15				TMEM106A
												TBC1D19				TMEM106B
												TBCA				TMEM212
												TBL1XR1				TMEM43
												TBX21				TMEM47
												TCEA1				TMEM64
												TCP11L1				TMEM86A
												TEC				TMTC1
												TEK				TNFRSF10D
												TGIF2LX				TNFRSF11A
												THAP2				TOP1
												THBS2				TOP2A
												TIA1				TPCN2
												TIMM21				TRA2B
												TIMM8A				TRAK2
												TM6SF1				TRAM2
												TM9SF3				TRIM11
												TMCO1				TRIM39
												TMEM106A				TRIP11
												TMEM106B				TSHZ2
												TMEM115				TTBK2
												TMEM231				TTC14
												TMEM236				TTC3
												TMEM47				TTC37
												TMEM64				TTL
												TMTC1				TTLL7
												TNFAIP2				TTYH2
												TNFAIP6				TUBA3D
												TNKS2				TUBE1
												TOP1				TULP4
												TOR1B				TXLNB
												TPCN2				TYW5
												TRA2B				UAP1L1
												TRAK2				UBE2N
												TRDN				UBE4A
												TRHDE				UBN2
												TRIM11				UBR2
												TRIM59				UBXN2A
												TRMT1L				UCHL5
												TROVE2				UCK2
												TRPA1				UFM1
												TSEN2				UNC5CL
												TSGA10				UQCRB
												TSHZ3				USO1
												TSTD2				USP12
												TTBK2				USP45
												TTC14				USP47
												TTC3				USP6NL
												TTC37				USP9X
												TTC39B				UTP23
												TTL				VAPB
												TTPA				WDFY4
												TULP4				WDR5B
												TWIST1				WDR70
												UACA				WDR78
												UBA3				VEGFA
												UBA5				WHSC1L1
												UBA6				WIPF1
												UBE2N				WNK1
												UBE2NL				WNK3
												UBE2T				VNN1
												UBE2W				VPS18
												UBN2				VSIG10
												UBR2				VSIG4*
												UBR3				VWA1
												UCHL5				XCR1
												UFL1				XPNPEP2
												UFM1				XRRA1
												UGP2				XYLT1
												ULBP2				YIPF4
												UQCRB				ZBTB7A
												USP12				ZDHHC21
												USP16				ZFAND2B
												USP25				ZFP36L2
												USP30				ZFYVE9
												USP45				ZMYM4
												USP6NL				ZMYND15
												USP9X				ZNF117
												UST				ZNF12
												UTRN				ZNF131
												UVRAG				ZNF136
												VAMP3				ZNF189
												VAPB				ZNF207
												WBP4				ZNF208
												WDFY4				ZNF248
												WDR13				ZNF257
												WDR33				ZNF280D
												WHSC1L1				ZNF320
												WIPF1				ZNF415
												VPS13A				ZNF471
												VPS4B				ZNF507
												WRN				ZNF563
												XG				ZNF626
												XPNPEP2				ZNF654
												XPNPEP3				ZNF655
												YES1				ZNF660
												YIPF4				ZNF695
												YTHDF3				ZNF703
												ZBTB7A				ZNF706
												ZC3H11A				ZNF708
												ZDBF2				ZNF721
												ZDHHC17				ZNF770
												ZDHHC21				ZNF790
												ZDHHC23				ZNF84
												ZFAND1				ZRANB2
												ZFP36L2
												ZFYVE9
												ZMYM2
												ZMYM4
												ZNF117
												ZNF131
												ZNF189
												ZNF19
												ZNF200
												ZNF208
												ZNF24
												ZNF248
												ZNF25
												ZNF254
												ZNF257
												ZNF273
												ZNF280D
												ZNF292
												ZNF451
												ZNF471
												ZNF502
												ZNF506
												ZNF507
												ZNF518B
												ZNF597
												ZNF626
												ZNF638
												ZNF660
												ZNF706
												ZNF708
												ZNF721
												ZNF770
												ZNF790
												ZNF91
												ZNF92
												ZWINT
